# Supplementary material for: Rational design of asymmetric benzodithiophene based photovoltaic polymers for efficient solar cells
Source: Royal Society of Chemistry journal article supplement (doi:10.1039/c7ta09736k), 2017-11-30
Supplement: c7ta09736k1.pdf [file c7ta09736k1.pdf]

Electronic Supplementary Material (ESI) for Journal of Materials Chemistry A.

This journal is © The Royal Society of Chemistry 2017

## Electronic Supplementary information (ESI)

### **Rational Design of Asymmetric Benzodithiophene based Photovoltaic Polymers for Efficient Solar Cells**

Tingting Zhu,<sup>‡a</sup> Deyu Liu,<sup>‡b,c</sup> Kaili Zhang,<sup>a</sup> Yonghai Li,<sup>\*b</sup> Zhe Liu,<sup>a</sup> Xudong Gao,<sup>a</sup>  
Xichang Bao,<sup>b</sup> Mingliang Sun<sup>\*a</sup> and Renqiang Yang<sup>\*b</sup>

*a. Institute of Material Science and Engineering, Ocean University of China, Qingdao 266100, China. \*Email - mlsun@ouc.edu.cn (M. Sun).*

*b. CAS Key Laboratory of Bio-based Materials, Qingdao Institute of Bioenergy and Bioprocess Technology, Chinese Academy of Sciences, Qingdao 266101, China. \*Email - liyh@qibebt.ac.cn (Y. Li), yangrq@qibebt.ac.cn (R. Yang).*

*c. University of Chinese Academy of Sciences, Beijing 100049, China.*

<sup>‡</sup> - Tingting Zhu and Deyu Liu contributed equally to this work.

## 1. Measurements and characterizations

$^1\text{H}$  NMR and  $^{13}\text{C}$  NMR spectra were collected on a Bruker AVANCE-III 600 Spectrometer with  $\text{CDCl}_3$  as the solvent. The molecular weight of the polymers was measured by gel permeation chromatography (GPC) using tetrahydrofuran (THF) as the eluent ( $40\text{ }^\circ\text{C}$ ) and polystyrene as the standard. Thermal gravimetric analysis (TGA) measurement was carried out by STA-409 at a heating rate of  $10\text{ }^\circ\text{C}/\text{min}$  under  $\text{N}_2$ . UV-vis absorption spectra were measured using a Hitachi U-4100 spectrophotometer. PL spectra were measured using a Fluoromax-4 fluorescence spectrometer. Cyclic voltammetry (CV) measurements was recorded on a CHI660D electrochemical workstation with a three-electrode system (a glassy carbon working electrode, a saturated calomel electrode (SCE) reference electrode and a platinum wire counter electrode) using a scan rate of  $100\text{ mV}/\text{s}$ .  $0.1\text{ M}$  tetrabutylammonium phosphorus hexafluoride in acetonitrile was used as the electrolyte. Atomic force microscopy (AFM) measurement was performed using Agilent 5400 scanning probe microscope in tapping-mode with MikroMasch NSC-15 AFM tips. Transmission electron microscopy (TEM) measurement was performed by using a HITACHI H-7650 electron microscope with an acceleration voltage of  $100\text{ kV}$ .

## 2. Device Fabrication and Testing

Photovoltaic devices were fabricated with a conventional device structure of ITO/PEDOT:PSS/active layer /PFN/Al. The ITO-coated glass substrates were cleaned successively with detergent, deionized water, acetone and isopropanol, and dried with  $\text{N}_2$  flow. And then, the PEDOT:PSS layer was spin-coated onto the ITO from different weight ratios of donor and  $\text{PC}_{71}\text{BM}$  blends in *o*-dichlorobenzene solution with different spin-coating speeds. The concentration of P1/acceptor blend solutions are  $15\text{ mg}/\text{mL}$ , and the concentration of P2/acceptor blend solutions are  $25\text{ mg}/\text{mL}$ . The solutions were stirred overnight at room temperature before spin-coating. Then PFN solution (in  $\text{CH}_3\text{OH}$ ) was spin-coating as electron transfer layer. Finally, aluminum ( $100\text{ nm}$ ) was evaporated onto the active layer at a vacuum of  $\sim 2 \times 10^{-4}\text{ Pa}$  to form the top electrode. The effective area of the device is  $0.1\text{ cm}^2$ . The current-voltage ( $J$ - $V$ ) characteristics

were measured with a Keithley 2420 source measurement unit. The PSCs were measured under an irradiation intensity of 100 mW/cm<sup>2</sup> (AM 1.5 G) by a Newport solar simulator. The EQE spectra were analyzed using a certified Newport IPCE measurement system. The hole and electron mobilities were calculated using the space charge limited current (SCLC) model with a device configuration of ITO/PEDOT:PSS/active layer/MoO<sub>3</sub>/Al and ITO/ZnO/active layer/PFN/Al, respectively, where the current density is calculated by:

$$J = 9\varepsilon\mu V^2/(8L^3)$$

where  $\varepsilon$  represents the dielectric constant of the metal, and  $\mu$  is the carrier mobility,  $V$  is the voltage drop across the device ( $V = V_{\text{appl}} - V_{\text{bi}}$ , where  $V_{\text{appl}}$  is the applied voltage to the device,  $V_{\text{bi}}$  is the built-in voltage due to the difference in work function of the two electrodes),  $L$  is the thickness of the active layer .

### 3. TGA curves

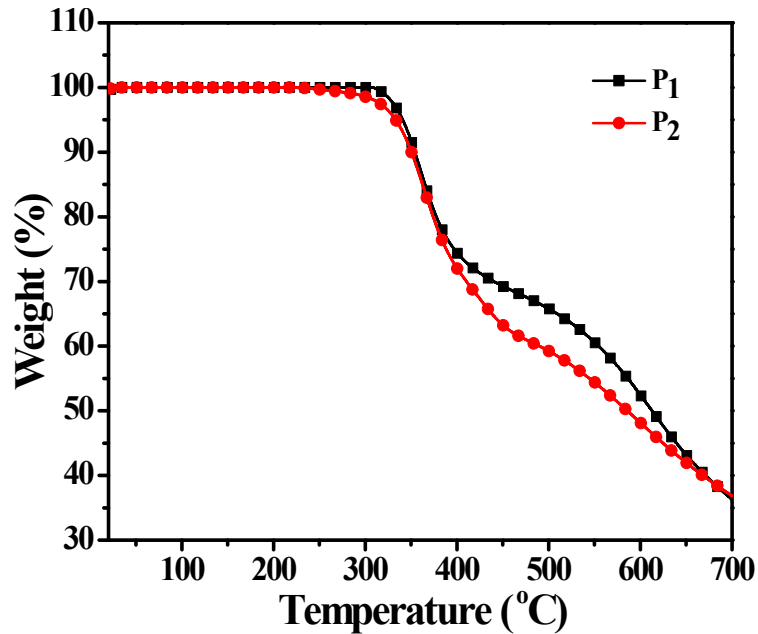

**Fig. S1** Thermogravimetric analysis (TGA) of the polymers.

#### 4. Temperature-dependent UV-vis absorption spectra

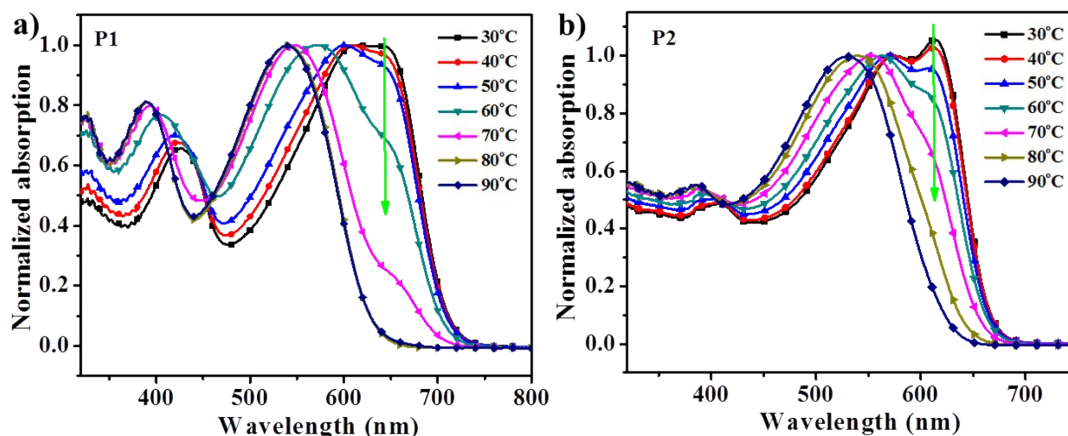

**Fig. S2** The temperature-dependent UV-vis absorption spectra of P1 and P2 in *o*-DCB dilute solutions.

#### 5. Photovoltaic performance

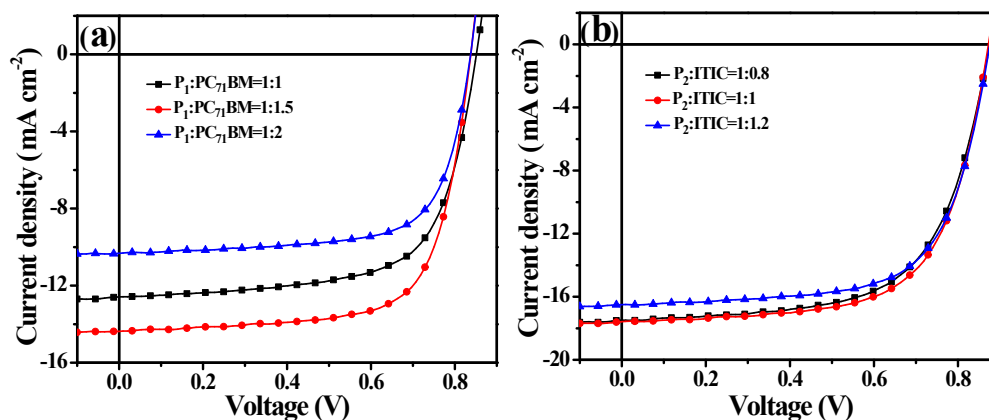

**Fig. S3** (a)  $J$ - $V$  curves of the PSCs based on P<sub>1</sub>/PC<sub>71</sub>BM with different donor/acceptor ratios ( 1:1, 1:1.5, 1:2 ); (b)  $J$ - $V$  curves of the PSCs based on P<sub>2</sub>/ITIC (thermal annealing) with different donor/acceptor ratios ( 1:0.8, 1:1, 1:1.2 ).

**Table S1.** The optimized details and the corresponding photovoltaic parameters of the PSCs

| Active layer                        | D/A<br>w/w | DIO<br>v/v% | Annealing<br>°C | $V_{OC}$<br>V | $J_{SC}$<br>mA cm <sup>-2</sup> | FF<br>% | PCE <sup>a</sup><br>% |
|-------------------------------------|------------|-------------|-----------------|---------------|---------------------------------|---------|-----------------------|
| P <sub>1</sub> :PC <sub>71</sub> BM | 1:1        | 0           | no              | 0.851         | 12.61                           | 66.82   | 7.17(6.95)            |
|                                     | 1:1.5      | 0           | no              | 0.838         | 14.35                           | 70.27   | 8.45(8.29)            |
|                                     | 1:1.5      | 0.5         | no              | 0.826         | 12.42                           | 69.85   | 7.17(6.82)            |
|                                     | 1:1.5      | 0           | 110             | 0.846         | 14.91                           | 65.40   | 8.24(7.93)            |

|                      |                                     |       |     |       |       |       |             |
|----------------------|-------------------------------------|-------|-----|-------|-------|-------|-------------|
|                      | 1:2                                 | 0     | no  | 0.837 | 10.31 | 70.09 | 6.05(5.79)  |
| P <sub>1</sub> :ITIC | 1:0.8                               | 0     | no  | 0.748 | 9.67  | 50.85 | 3.68(3.65)  |
|                      | 1:1                                 | 0     | no  | 0.772 | 15.20 | 54.02 | 6.35(6.10)  |
|                      | 1:1                                 | 0.5   | no  | 0.770 | 11.83 | 49.40 | 4.52(4.37)  |
|                      | 1:1                                 | 0     | 150 | 0.732 | 14.10 | 51.35 | 5.30(5.18)  |
|                      | 1:1.5                               | 0     | no  | 0.784 | 14.98 | 53.36 | 6.22(6.03)  |
|                      | P <sub>2</sub> :PC <sub>71</sub> BM | 1:1   | 0   | no    | 0.807 | 9.16  | 61.81       |
| 1:2                  |                                     | 0     | no  | 0.842 | 7.94  | 69.44 | 4.64(4.50)  |
| 1:2                  |                                     | 0.5   | no  | 0.833 | 7.73  | 69.14 | 4.45(4.35)  |
| 1:2                  |                                     | 0     | 110 | 0.840 | 8.20  | 66.20 | 4.55(4.24)  |
| 1:2.5                |                                     | 0     | no  | 0.853 | 6.55  | 68.82 | 3.85(3.58)  |
| P <sub>2</sub> :ITIC |                                     | 1:0.8 | 0   | 0     | 0.891 | 17.63 | 58.27       |
|                      | 1:0.8                               | 0     | 110 | 0.870 | 17.29 | 63.65 | 9.58(9.45)  |
|                      | 1:1                                 | 0     | 0   | 0.903 | 17.35 | 61.81 | 9.68(9.32)  |
|                      | 1:1                                 | 0     | 110 | 0.873 | 17.60 | 65.37 | 10.04(9.88) |
|                      | 1:1                                 | 0.5   | 110 | 0.892 | 16.14 | 65.06 | 9.40(9.22)  |
|                      | 1:1.2                               | 0     | 0   | 0.901 | 16.07 | 61.85 | 8.96(8.73)  |
|                      | 1:1.2                               | 0     | 110 | 0.876 | 16.13 | 65.27 | 9.22(8.98)  |

<sup>a</sup> values were provided in optimal (average) results based on more than 10 devices for each case.

## 6. Mobilities based on SCLC measurement

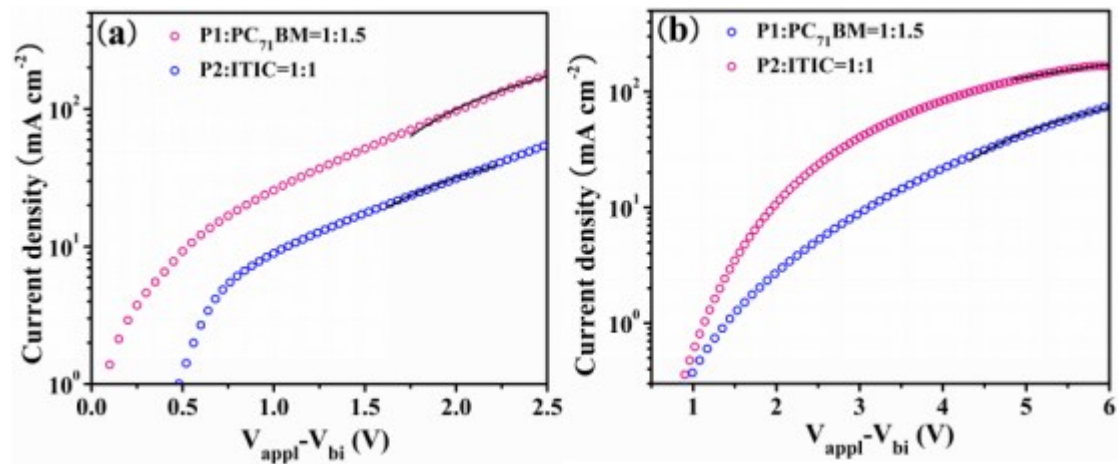

**Fig. S4** Plots obtained from the a) hole-only and b) electron-only devices. (The symbols are experimental data for transport of hole, and the black lines are fitted according to the space-charge-limited-current model).

## 7. Photoluminescence emission spectra

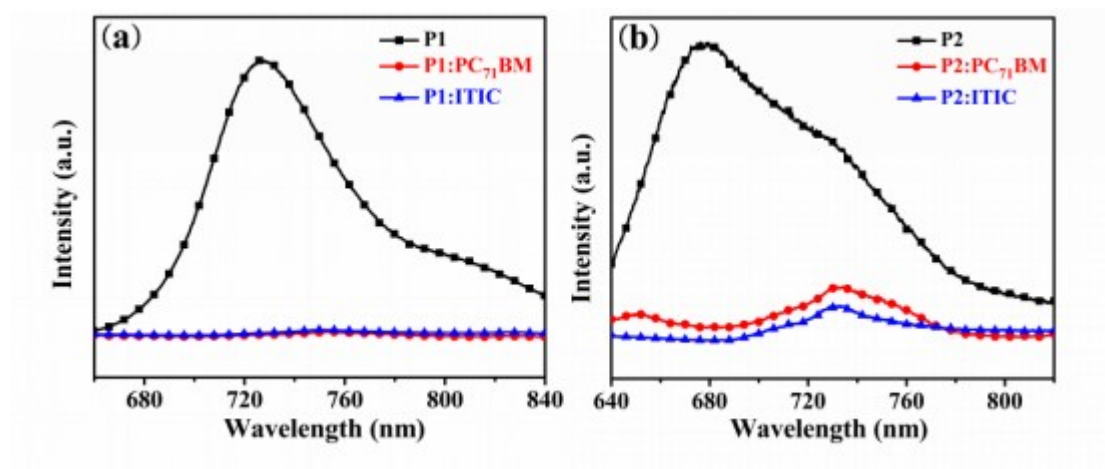

Fig. S5 PL emission spectra of pure polymers P1, P2 and blend films.

## 8. NMR Spectra

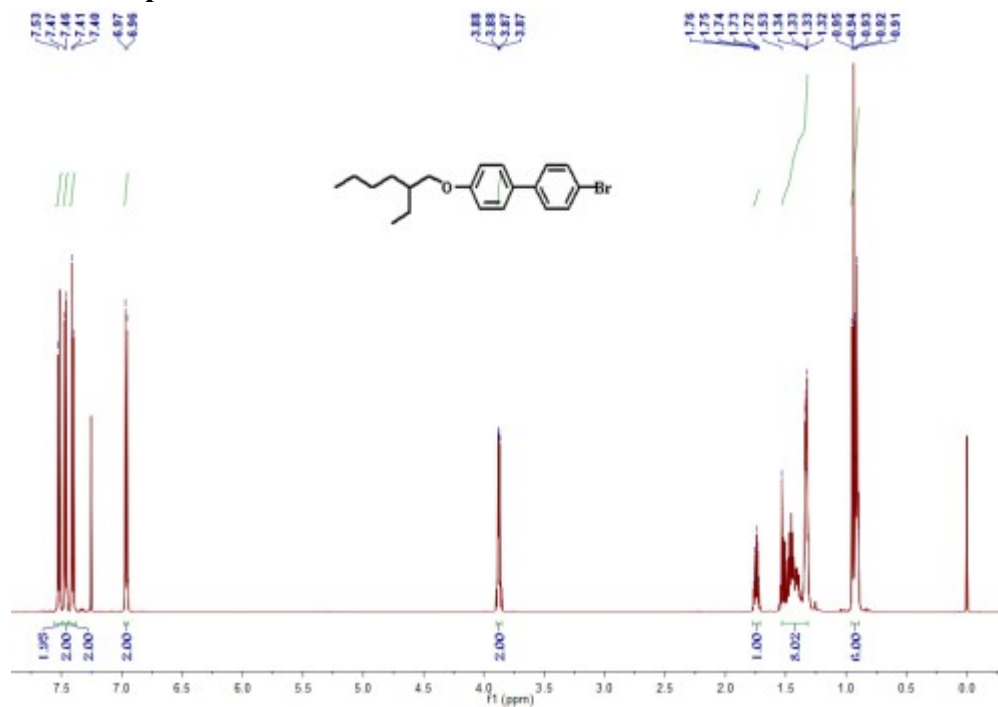

Fig. S6 <sup>1</sup>H NMR spectrum of compound 2.

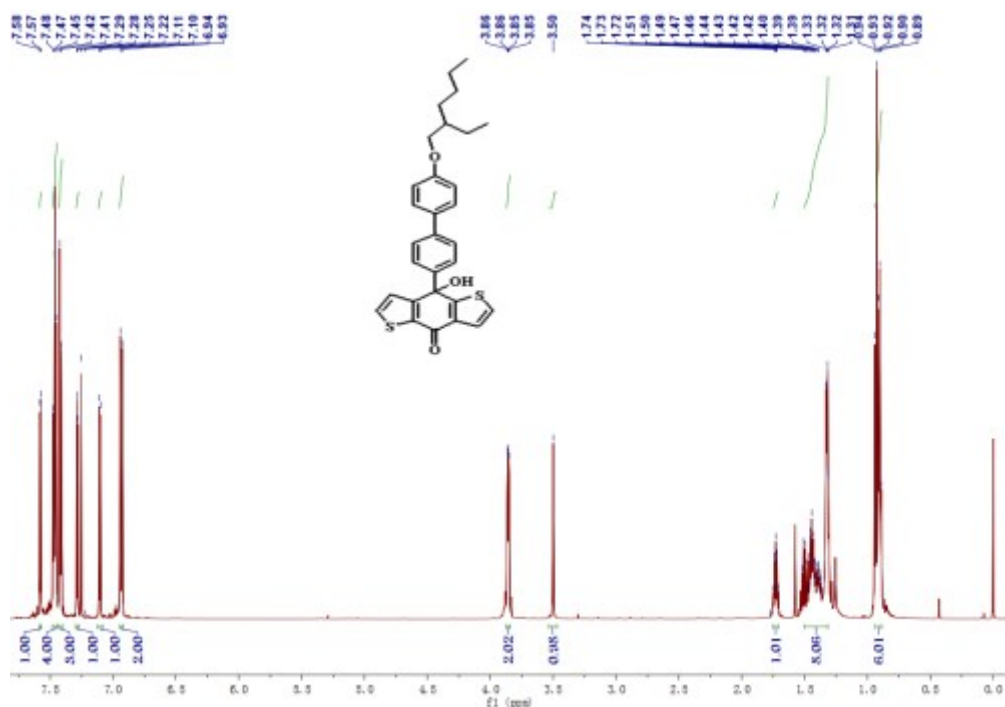

Fig. S7 <sup>1</sup>H NMR spectrum of compound 3.

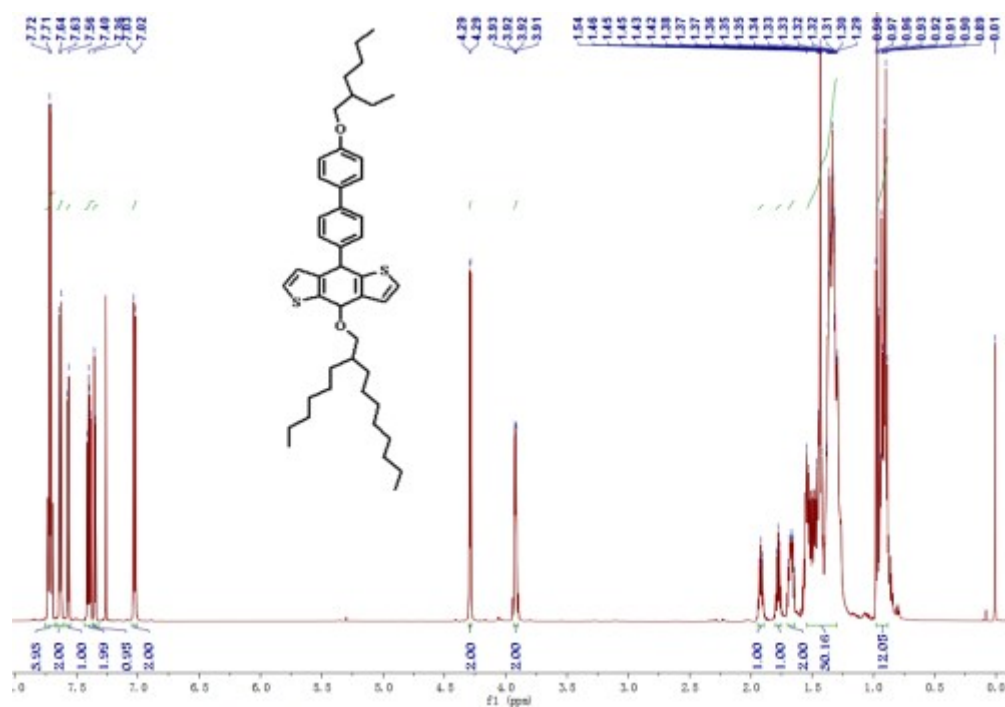

Fig. S8 <sup>1</sup>H NMR spectrum of compound 4.





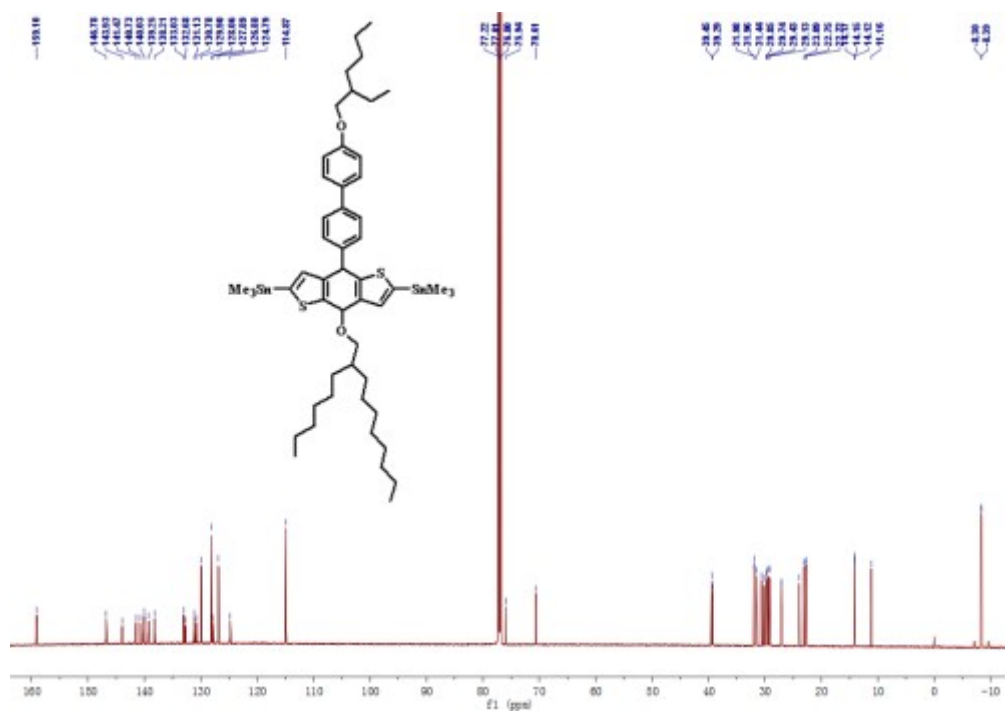

Fig. S11  $^{13}\text{C}$  NMR spectrum of compound asy-BDTBP.
